# Supplementary material for: Novel germanene–arsenene and germanene–antimonene lateral heterostructures: interline-dependent electronic and magnetic properties
Source: Royal Society of Chemistry journal article supplement (doi:10.1039/d3cp00828b), 2023-01-01
Supplement: d3cp00828b1.pdf [file d3cp00828b1.pdf]

## Novel Germanene-Arsenene and Germanene-Antimonene Lateral Heterostructures: Interline-dependent Electronic and Magnetic Properties

Chu Viet Ha,<sup>1</sup> Bich Ngoc Nguyen Thi,<sup>2</sup> Pham Quynh Trang,<sup>1</sup> R. Ponce-Pérez,<sup>3</sup> J. Guerrero-Sanchez,<sup>3</sup> and D. M. Hoat<sup>4,5,\*</sup>

<sup>1</sup>Faculty of Physics, TNU-University of Education, Thai Nguyen, Vietnam

<sup>2</sup>Institute of Physics, Vietnam Academy of Science and Technology, 18 Hoang Quoc Viet, Cau Giay, Hanoi, Vietnam

<sup>3</sup>Universidad Nacional Autónoma de México, Centro de Nanociencias y Nanotecnología, Apartado Postal 14, Ensenada, Baja California, Código Postal 22800, Mexico

<sup>4</sup>Institute of Theoretical and Applied Research, Duy Tan University, Ha Noi 100000, Viet Nam

<sup>5</sup>Faculty of Natural Sciences, Duy Tan University, Da Nang 550000, Viet Nam

\*Corresponding author: [dominhhoat@duytan.edu.vn](mailto:dominhhoat@duytan.edu.vn)

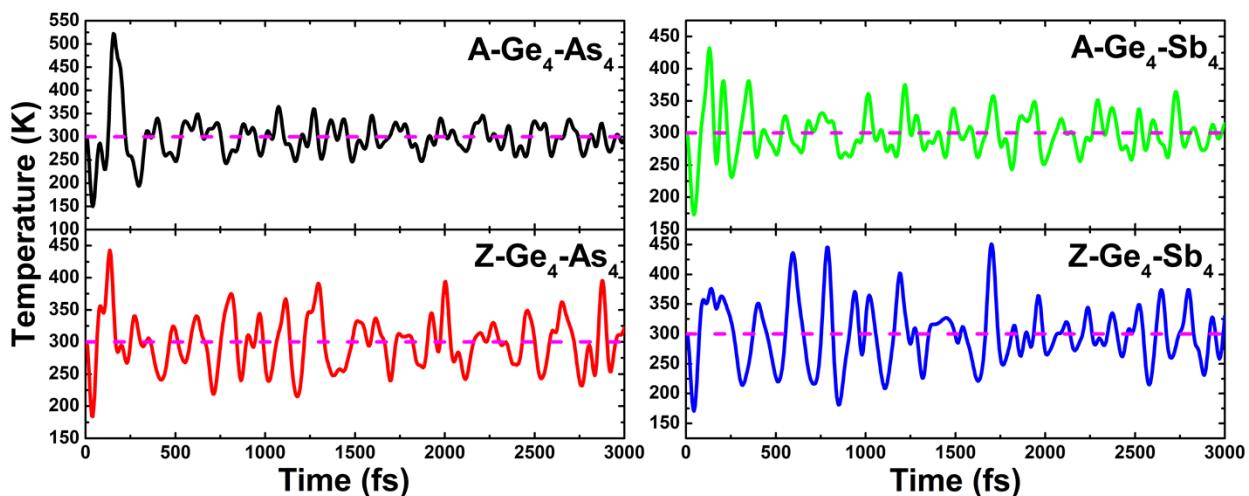

Figure S1: AIMD simulations at 300 K of germanene-arsenene and germanene-antimonene lateral heterostructures.

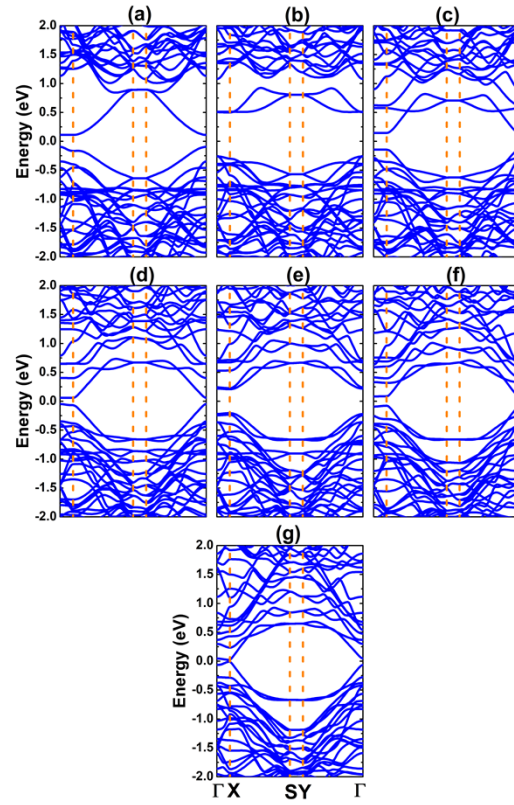

Figure S2: Electronic band structure (Blue curve: non-spin polarization) of armchair-interline  $\text{Ge}_m\text{-Sb}_{8-m}$  lateral heterostructures with (a)  $m = 1$ , (b)  $m = 2$ , (c)  $m = 3$ , (d)  $m = 4$ , (e)  $m = 5$ , (f)  $m = 6$ , and (g)  $m = 7$ .

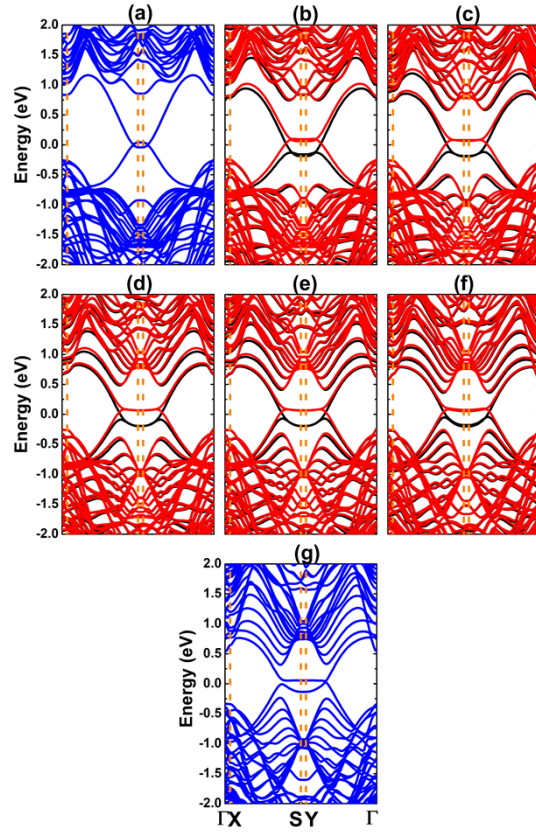

Figure S3: Electronic band structure (Blue curve: non-spin polarization; Black curve: spin-up; Red curve: spin-down) of zigzag-interline  $\text{Ge}_m\text{-Sb}_{8-m}$  lateral heterostructures with (a)  $m = 1$ , (b)  $m = 2$ , (c)  $m = 3$ , (d)  $m = 4$ , (e)  $m = 5$ , (f)  $m = 6$ , and (g)  $m = 7$ .
